# Supplementary material for: Evolution of chronic renal impairment and long-term mortality after de novo acute kidney injury in the critically ill; a Swedish multi-centre cohort study
Source: PubMed Central journal article supplement (PMC4457200; doi:10.1186/s13054-015-0920-y), 2015-05-06
Supplement: 13054_2015_920_MOESM1_ESM.pdf [file 13054_2015_920_MOESM1_ESM.pdf]

## **Additional file 1.**

### **Content:**

#### **Part A.**

- Details of the Swedish intensive care register. Page 1

#### **Part B.**

- Summary of details of excluded cases. Page 2
- Table 1. Comparison of characteristics and outcome of excluded patients. Page 3 and 4.

#### **Part C**

- Table 2. Time specific survival probability according to AKI status. Page 5
- Table 3. Time specific probability of developing ESRD and CKD in AKI and No AKI groups. Page 5
- Table 4. Adjusted survival centiles. Page 6
- Figure 1. Estimates of cumulative risk of developing CKD, ESRD or of death in patients with AKI. Page 6.

## **A**

### **Details of the Swedish intensive care register.**

The Swedish intensive care register (SIR) uses national personal identification numbers to identify patients in the register and admissions to ICU without valid national personal identification are assigned a temporary number. SIR data is collected prospectively and transferred electronically to the register. A validation script identifies logical defects and returns these to each centre for re-evaluation prior to data being entered in the master database.

During the course of the study SIR used three disease severity scoring systems., including APACHE II (Acute physiology and Chronic health evaluation) used between 2008-2010, SAPS (Simplified Acute Physiology Score) version II (2005 - 2009) and SAPS III (2008-2011). Additionally the admission reason according to APACHE recorded on ICU entry and ICD-10 diagnoses determined at discharge, are available in many but not all patients.

## **B.**

### **Summary of details of excluded cases.**

Analysis showed that these ineligible patients were somewhat younger and had significantly shorter lengths of ICU stay. The incidence of all Charlson comorbidity groups was significantly lower than in the remaining cohort with the exception of HIV infection. The percentage of deleted records was highest in first years of the study and in 2006, 59% of data was excluded. As reporting improved the percentage of patients with incomplete records decreased rapidly and represented 0.6% of the 2010 cohort. Quality of reporting varied initially between intensive care units with 6 units failing to report sufficient information in more than 20% of their cases. One year mortality for the excluded patients was significantly lower than for the remaining cohort (23.7% versus 27.1% respectively ( $p < 0.000$ )) and rates of ESRD did not differ from the overall ICU population.

**Table 1. Comparison of characteristics and outcome of patients excluded due to insufficient data versus the included cohort.**

| <b>Baseline characteristics</b>               | <b>Patients included in the study.<br/>N= 103,363</b> | <b>Excluded Cases.<br/>N = 26666</b> | <b>P</b> |
|-----------------------------------------------|-------------------------------------------------------|--------------------------------------|----------|
| Age (years) mean                              | 60.3                                                  | 59.0                                 | <0.001   |
| Age (years) median                            | 64                                                    | 62                                   |          |
| Length of ICU stay (hours) median             | 24                                                    | 20                                   | <0.001   |
| Female (%) N= 44,480                          | 43.0%                                                 | 43.9                                 | 0.008    |
| Number of admissions (mean)                   | 1.31                                                  | 1.33                                 | <0.001   |
| <b>Comorbidity (%)</b>                        |                                                       |                                      |          |
| Myocardial infarction<br>N=14605              | 14.1                                                  | 12.5                                 | <0.001   |
| Congestive cardiac failure<br>N= 16281        | 15.8                                                  | 14.06                                | <0.001   |
| Peripheral vascular disease<br>N= 10948       | 10.6                                                  | 9.9                                  | <0.001   |
| Cerebro-vascular disease<br>N=17742           | 17.2                                                  | 16.06                                | <0.001   |
| Dementia<br>N= 2070                           | 2.0                                                   | 1.94                                 | 0.52     |
| COPD<br>N=14841                               | 14.4                                                  | 11.95                                | <0.001   |
| Rheumatological disease<br>N=4006             | 3.9                                                   | 3.41                                 | <0.001   |
| Peptic ulcer disease<br>N= 6729               | 6.5                                                   | 6.08                                 | <0.001   |
| Cancer<br>N= 18175                            | 17.6                                                  | 15.1                                 | <0.001   |
| Metastatic disease<br>N= 3747                 | 3.6                                                   | 2.85                                 | <0.001   |
| Mild Liver disease<br>N=5272                  | 5.1                                                   | 4.7                                  | <0.001   |
| Moderate or severe lever disease<br>N= 2436   | 2.4                                                   | 2.06                                 | <0.001   |
| Uncomplicated Diabetes<br>N=16664             | 16.1                                                  | 14.32                                | <0.001   |
| Diabetes with complications<br>N=6756         | 6.5                                                   | 5.76                                 | <0.001   |
| Paraplegia<br>N=2004                          | 1.9                                                   | 1.53                                 | <0.001   |
| HIV N=137                                     | 0.13                                                  | 0.15                                 | <0.001   |
| Renal disease                                 | 5.4                                                   | 4.3                                  | <0.001   |
| <b>Outcome (%)</b>                            |                                                       |                                      |          |
| Died 1 year (all cohort 27.06)                | 27.06                                                 | 23.7                                 | <0.001   |
| ESRD                                          | 0.51                                                  | 0.56                                 | 0.34     |
| <b>1-year mortality by admission year (%)</b> |                                                       |                                      |          |
| 2005                                          | 25.9                                                  | 24.9                                 | 0.2      |
| 2006                                          | 31.5                                                  | 23.6                                 | <0.001   |
| 2007                                          | 28.9                                                  | 23.7                                 | <0.001   |
| 2008                                          | 26.8                                                  | 18.8                                 | <0.001   |

| <b>Table 1 continued<br/>Baseline characteristics</b>                   | <b>Patients included<br/>in the study.<br/>N= 103,363</b> | <b>Excluded<br/>Cases.<br/>N = 26666</b> | <b>P</b> |
|-------------------------------------------------------------------------|-----------------------------------------------------------|------------------------------------------|----------|
| 2009                                                                    | 26·9                                                      | 23·2                                     | 0·48     |
| 2010                                                                    | 26·0                                                      | 15·4                                     | 0·02     |
| No of cases by admission year, N (%)                                    |                                                           |                                          |          |
| 2005                                                                    | 177007 (86%)                                              | 2775 (24%)                               |          |
| 2006                                                                    | 8328 (40·8%)                                              | 12064 (59·2%)                            |          |
| 2007                                                                    | 9598 (46%)                                                | 11291 (54%)                              |          |
| 2008                                                                    | 20248 (98·9%)                                             | 234 (0·1%)                               |          |
| 2009                                                                    | 23100 (99·6)                                              | 95 (0·4%)                                |          |
| 2010                                                                    | 25011 (99·4)                                              | 156 (0·6%)                               |          |
| COPD= Chronic obstructive pulmonary disease, AKI = Acute Kidney Injury. |                                                           |                                          |          |

C

**Table 2. Time specific survival probability according to AKI status·**

| Group  | Survival probability (%) |           |        |           |         |           |        |           |        |           |        |           |
|--------|--------------------------|-----------|--------|-----------|---------|-----------|--------|-----------|--------|-----------|--------|-----------|
|        | 30 day                   | CI        | 90 day | CI        | 180 day | CI        | 1 year | CI        | 3 year | CI        | 5 year | CI        |
| No AKI | 84·0                     | 83·8-84·3 | 80·6   | 80·4-80·9 | 78·5    | 78·4-78·7 | 75·4   | 75·1-75·6 | 67·2   | 66·9-67·5 | 60·8   | 60·5-61·3 |
| AKI    | 61·9                     | 60·6-63·2 | 56·5   | 55·1-57·8 | 54·0    | 52·6-55·3 | 51·3   | 50·0-52·6 | 43·2   | 41·8-44·7 | 38·2   | 36·4-40·0 |

CKD= Chronic Kidney disease· ESRD= End Stage Renal disease· AKI= Acute kidney Injury· CI= 95% Confidence interval.

**Table 3. Time specific probability of developing ESRD and CKD in AKI and No AKI groups.**

| Group  | Outcome | Estimate of percentage of patients who develop outcome at specific time points· |           |        |           |       |           |        |           |
|--------|---------|---------------------------------------------------------------------------------|-----------|--------|-----------|-------|-----------|--------|-----------|
|        |         | 6 months                                                                        | CI        | 1 year | CI        | 3year | CI        | 5 year | CI        |
| No AKI | ESRD    | 0·05                                                                            | 0·04-0·07 | 0·08   | 0·06-0·10 | 0·20  | 0·16-0·23 | 0·3    | 0·25-0·38 |
| AKI    |         | 1·8                                                                             | 1·4-2·4   | 2·0    | 1·6-2·7   | 3·0   | 2·2-4·0   | 3·9    | 2·7-5·5   |
| No AKI | CKD     | 0·21                                                                            | 0·18-0·24 | 0·44   | 0·39-0·49 | 1·1   | 1·0-1·2   | 1·8    | 1·6-1·9   |
| AKI    |         | 3·7                                                                             | 3·0-4·4   | 6·0    | 5·1-7·0   | 8·7   | 7·5-10·2  | 10·5   | 13·0      |

CKD= Chronic Kidney disease· ESRD= End Stage Renal disease· AKI= Acute kidney Injury· CI= 95% Confidence interval.

**Table 4. Adjusted survival centiles. Values show how estimated survival in days differs for the first 30 percent of patients according to covariate patterns.**

| Group                                | Adjusted model *                                        |              |       |              |       |              |
|--------------------------------------|---------------------------------------------------------|--------------|-------|--------------|-------|--------------|
|                                      | Survival percentiles difference versus reference values |              |       |              |       |              |
|                                      | 10th                                                    | CI           | 20th  | CI           | 30th  | CI           |
| Male (Referent)                      | 0                                                       |              | 0     |              | 0     |              |
| Female                               | 13.6                                                    | 2.4 -25.0    | 10.5  | -4.8- 25     | 9.6   | -7.5-26.6    |
| No AKI (Referent)                    | 0                                                       |              | 0     |              | 0     |              |
| AKI                                  | -22.9                                                   | -41.7- -4.3  | -36.2 | -58.5-13.8   | -42.2 | -69.5- -14.9 |
| Age: 60 years (Referent)             | 0                                                       |              | 0     |              | 0     |              |
| Every 1 year increase in age         | -8.6                                                    | -9.1- -8.1   | -13.6 | -14.1-13.0   | -16.3 | -16.9- 15.6  |
| SAPS III score: 54 points (Referent) | 0                                                       |              | 0     |              | 0     |              |
| Every one unit increase in score     | -12.6                                                   | -13.2- -11.9 | -19.3 | -20- -18.6   | -23.2 | -23.9- -22.5 |
| Diabetes uncomplicated               | -21.3                                                   | -36.6- -6.1  | -26.3 | -48.5- -4.0  | -30.4 | -54.3- -6.5  |
| Diabetes with complications          | -16.5                                                   | -40.0-7.0    | -16.5 | -46.6-13.5   | -40.7 | -72.2- -9.3  |
| Myocardial infarction                | -21.0                                                   | -33.6- -8.0  | -35.8 | -54.0- -18.6 | -60.5 | -79.9--41.1  |

AKI= Acute kidney injury. CI= 95% Confidence interval. SAPS = Simplified Physiology Score. \*Model adjusted for sex, age, SAPS3 score, myocardial infarction and Diabetes Mellitus.

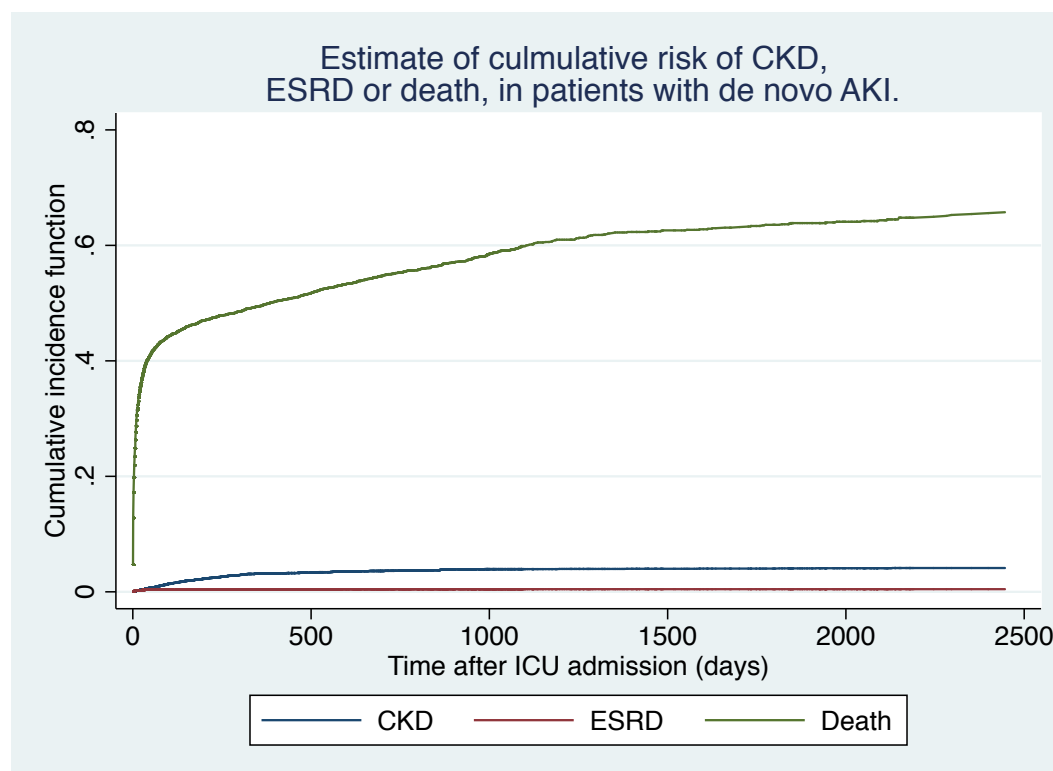

**Figure 1. Estimates of cumulative risk of developing CKD, ESRD or of death in patients with de novo AKI.**

CKD= Chronic Kidney disease· ESRD= End Stage Renal disease· AKI= Acute kidney Injury·
